# Supplementary material for: Tetrandrine Attenuates Podocyte Injury by Inhibiting TRPC6-Mediated RhoA/ROCK1 Pathway
Source: Hindawi journal article supplement (doi:10.1155/2022/7534181), 2022-09-30

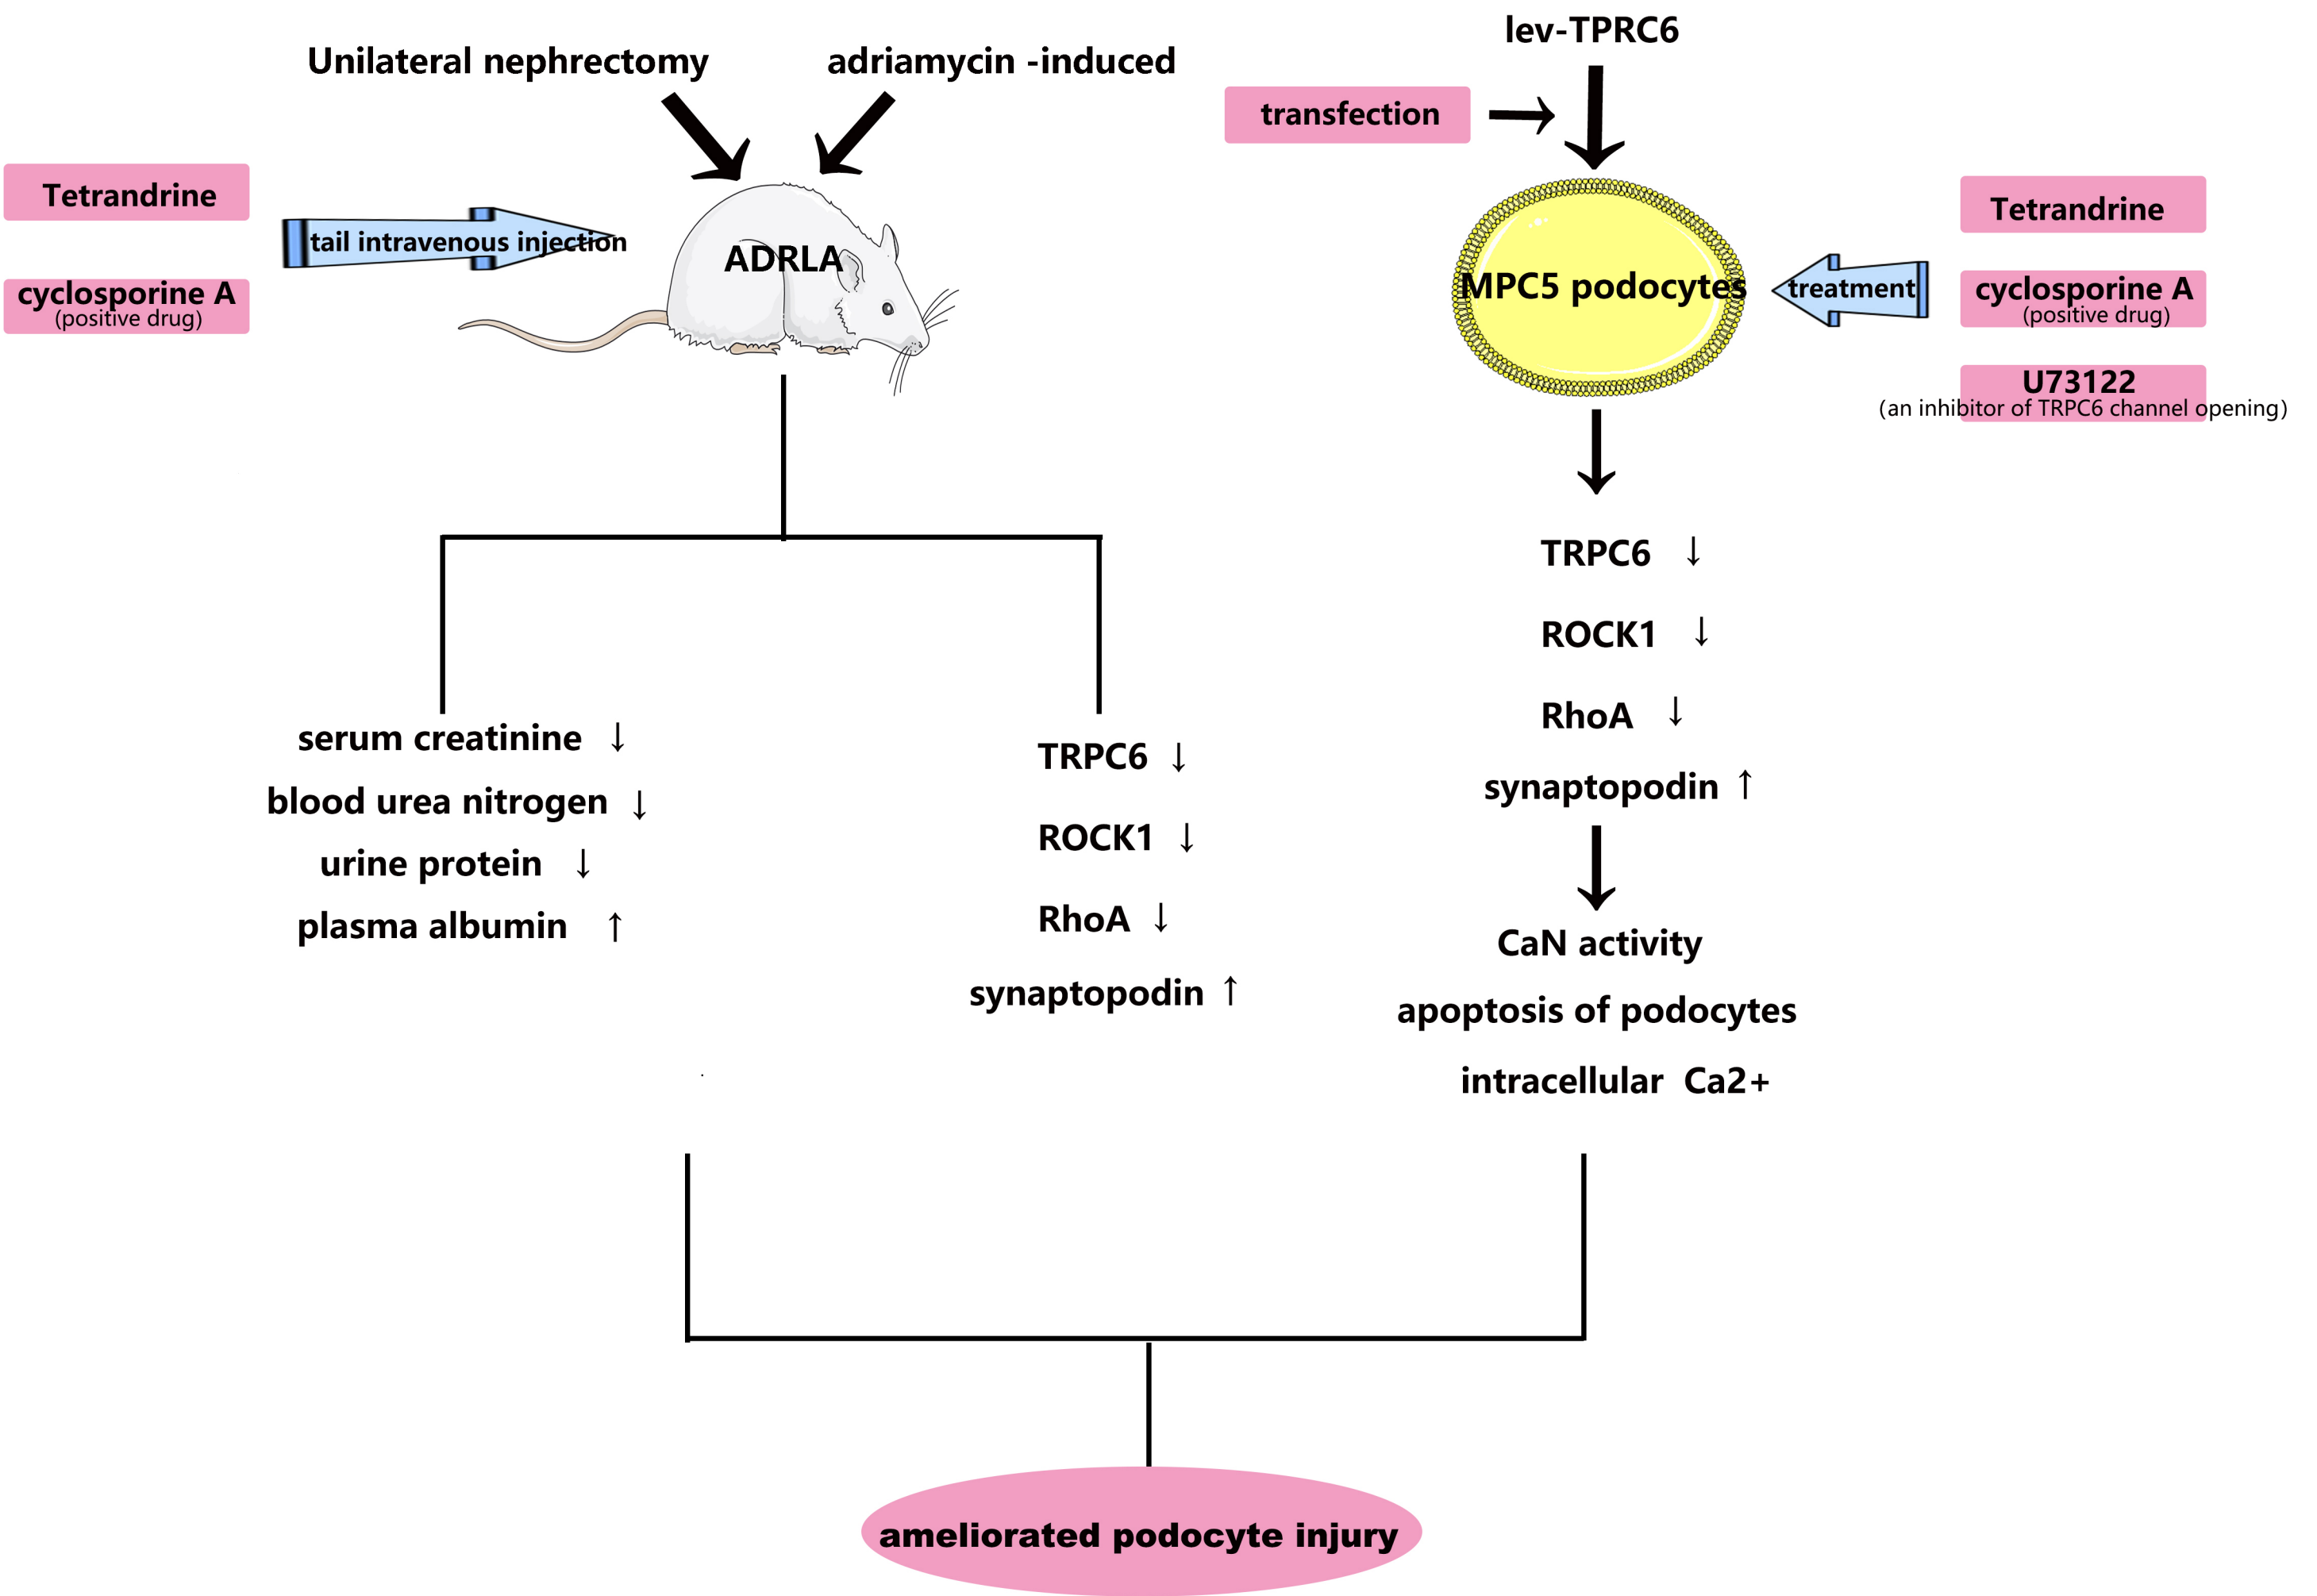

Supplement: f1 [file 7534181.f1.pdf]
